# Supplementary material for: The oncogenic fusion protein TAZ::CAMTA1 promotes genomic instability and senescence through hypertranscription
Source: PubMed Central journal article supplement (PMC10657451; doi:10.1038/s42003-023-05540-4), 2023-11-18
Supplement: 42003_2023_5540_MOESM1_ESM.pdf [file 42003_2023_5540_MOESM1_ESM.pdf]

# Supplementary Figure 1

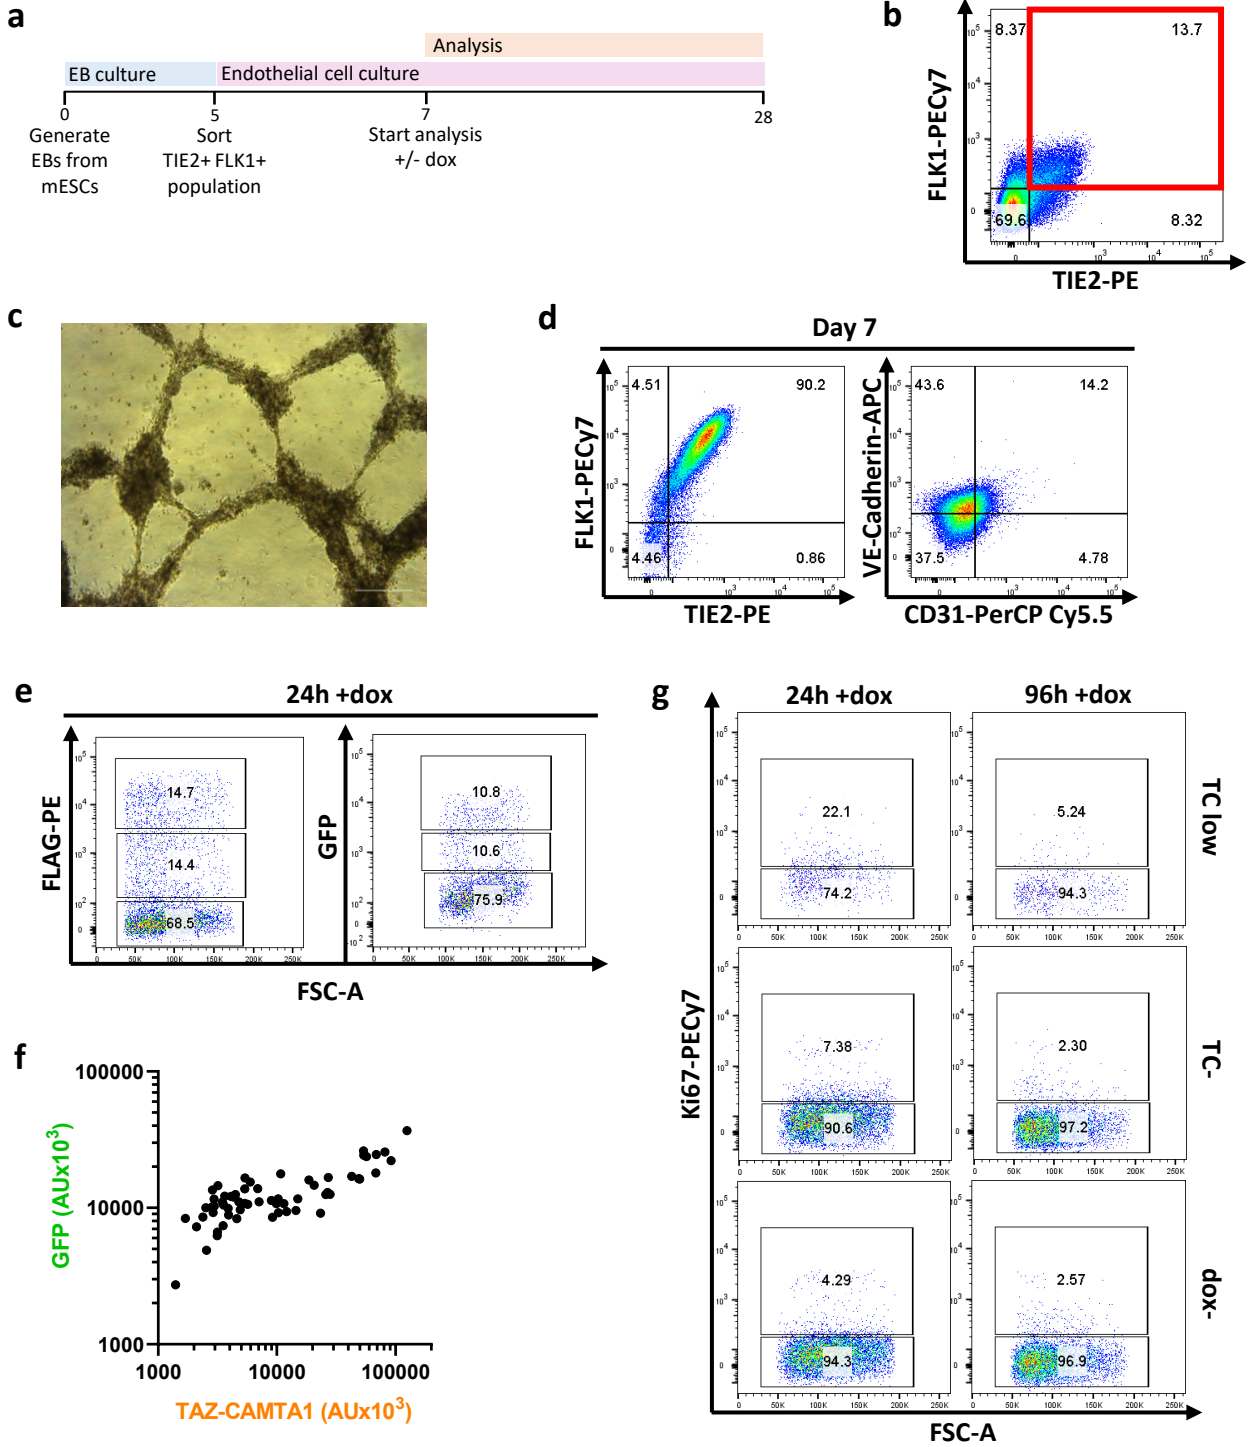

**Supplementary Figure 1. A model for generating endothelial cells with inducible TC expression.**

**a** Differentiation timeline for the production of endothelial cells from mESCs, by sorting a progenitor population from EBs.

**b** Representative flow cytometry plot showing the TIE2<sup>+</sup> FLK1<sup>+</sup> population sorted from day 5 EBs for endothelial cell differentiation.

**c** Representative image showing tube-like formation ability of endothelial cells in Matrigel plug. Scale bar=100 $\mu$ m.

**d** Representative flow cytometry plots showing the expression of four endothelial cell markers (FLK1, TIE2, CD31, VE-Cadherin) in endothelial cells 7 days after sorting.

**e** Representative flow cytometry plots showing FLAG and GFP expression against FSC-A, both of which are markers of TC.

**f** Positive correlation between TC expression, measured using the FLAG epitope, and GFP expression, which is expressed via an IRES upon dox induction for tracking induced cells.

**g** Representative flow cytometry plots showing the percentage of Ki67<sup>+</sup> endothelial cells within TC low, neg, and uninduced populations, at 24h and 96h after dox induction.

**h** Representative flow cytometry plots showing EdU incorporation against Hoechst staining in TC high, TC low, TC- and uninduced endothelial cell populations when not subject to cell cycle synchronisation.

# Supplementary Figure 2

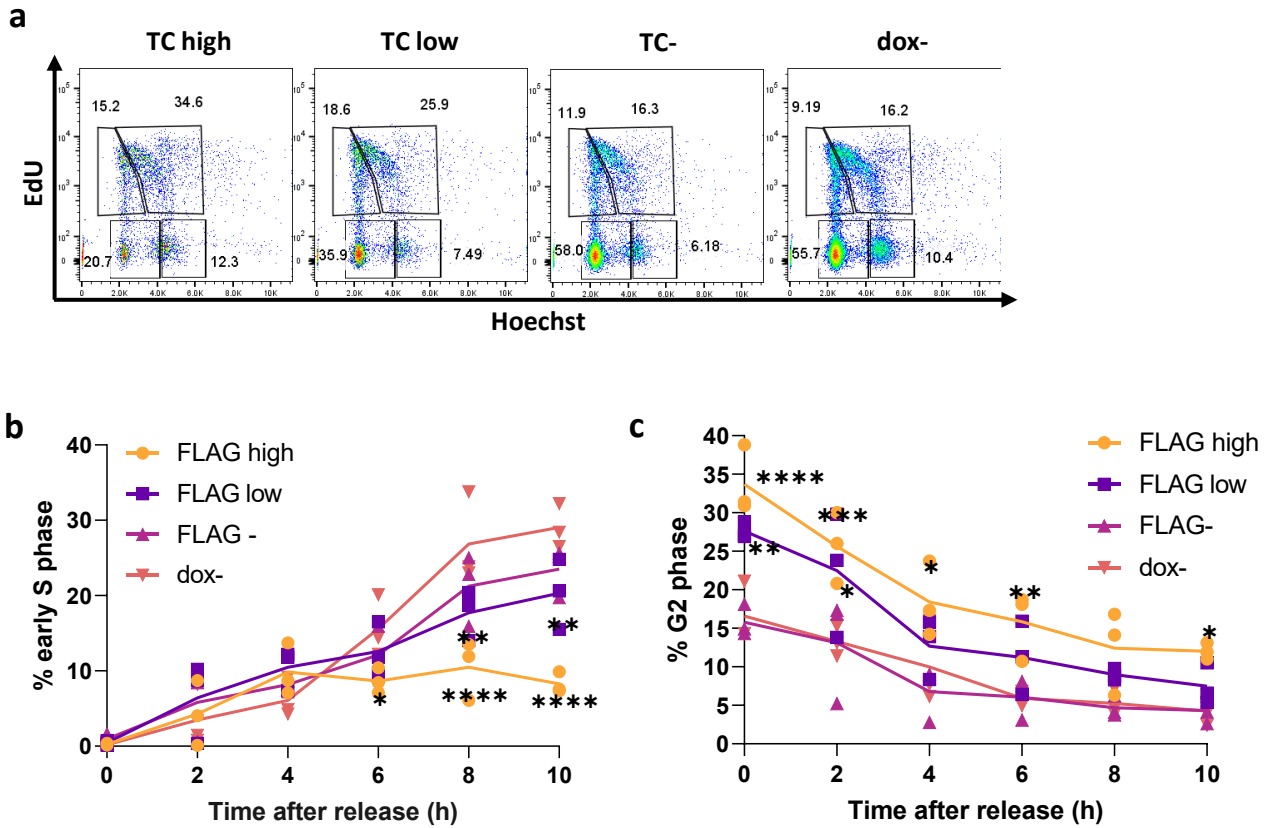

## Supplementary Figure 2. TC expression causes endothelial cell cycle arrest.

**a** Representative flow cytometry plots showing EdU incorporation against Hoechst staining in TC high, TC low, TC- and uninduced endothelial cell populations when not subject to cell cycle synchronisation.

**b** Proportion of cells in early S phase over 10h following release from thymidine block, in TC high, TC low, TC- and uninduced endothelial cell populations, n=3.

**c** as **b** but for proportion of cells in G2 phase, n=3. Statistical significance was determined by two-way ANOVA with Dunnett's multiple comparisons test. In all panels error bars show SEM, and \*p<0.05, \*\*p<0.01, \*\*\*p<0.001, \*\*\*\*p<0.0001.

# Supplementary Figure 3

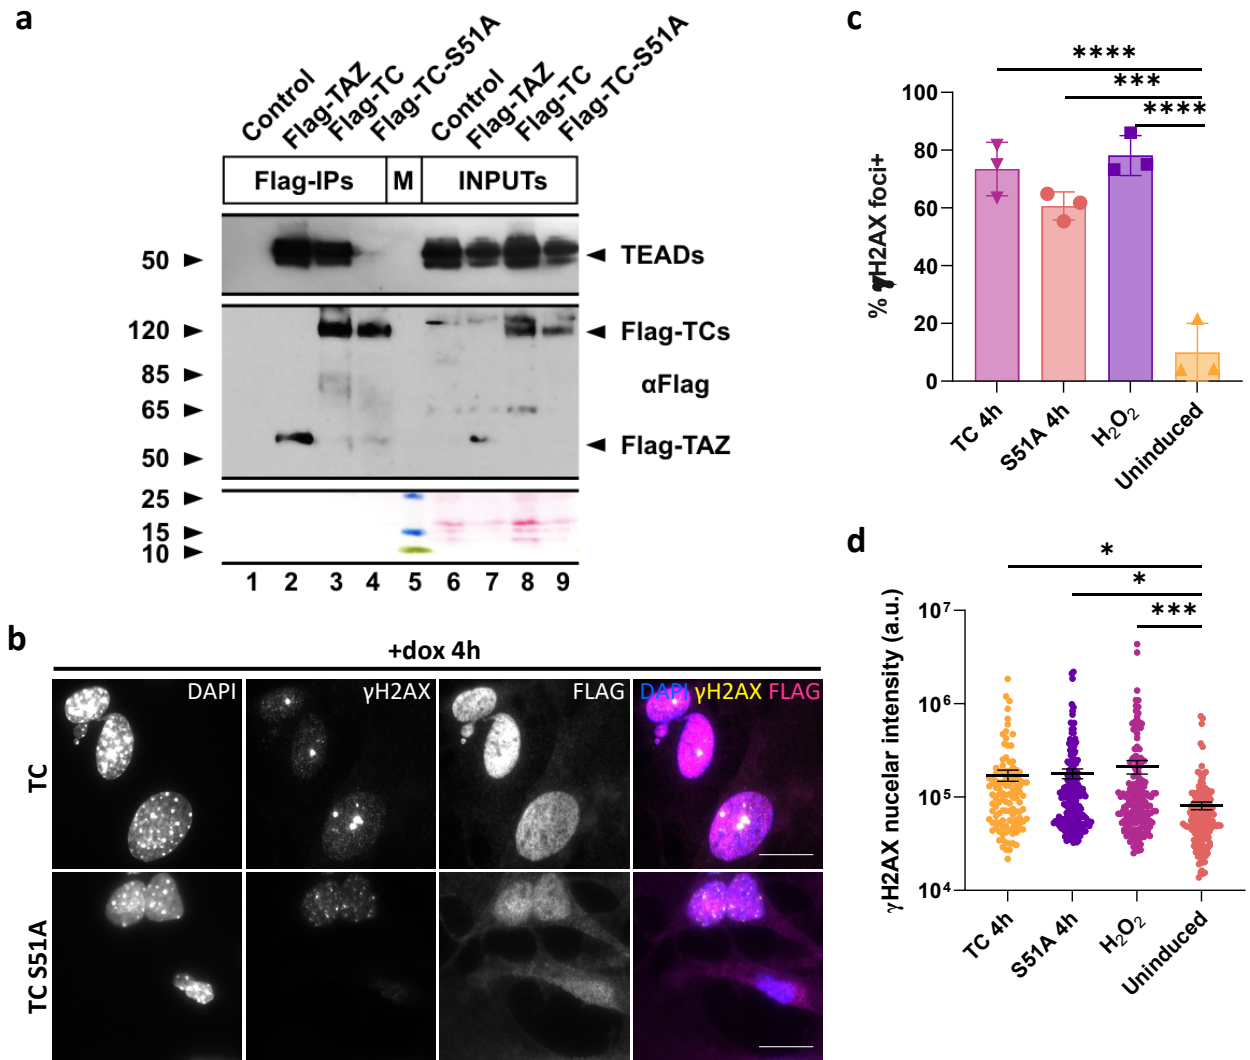

## Supplementary Figure 3. TC causes endothelial cells to accumulate DNA double strand breaks immediately upon its expression

**a** Co-immunoprecipitation of exogenously expressed Flag-tagged TAZ, TC and TC-S51A proteins, and TEAD proteins (endogenous) in HEK293 cells. INPUT represents 10% of the total lysed used for the IP.

**b** Representative images showing endothelial cells treated with dox for 4h to induce TC expression. Cells treated with 30μM H<sub>2</sub>O<sub>2</sub> for 4h were used as a positive control. Cells were stained with DAPI (nuclei; blue), FLAG antibody (TC; magenta), and γH2AX antibody (phospho-H2AX; yellow). All imaging was performed on a Zeiss fluorescence widefield microscope using a 63x oil immersion objective. Scale bars=20μm.

**c** The frequency of endothelial cells positive for γH2AX foci from the imaging experiments as presented in **b**. Cells with >10 foci were considered positive. Significance was calculated by one-way ANOVA and Dunnett's multiple comparisons test.

**d** Nuclear fluorescence intensity of γH2AX staining in cells from the imaging experiments as presented in **b**. Significance was calculated by one-way ANOVA and Dunnett's multiple comparisons test. In all imaging experiments, at least 150 cells per condition were analysed, n=3. In all panels error bars show SEM, and \*p<0.05, \*\*p<0.01, \*\*\*p<0.001, \*\*\*\*p<0.0001.

# Supplementary Figure 4

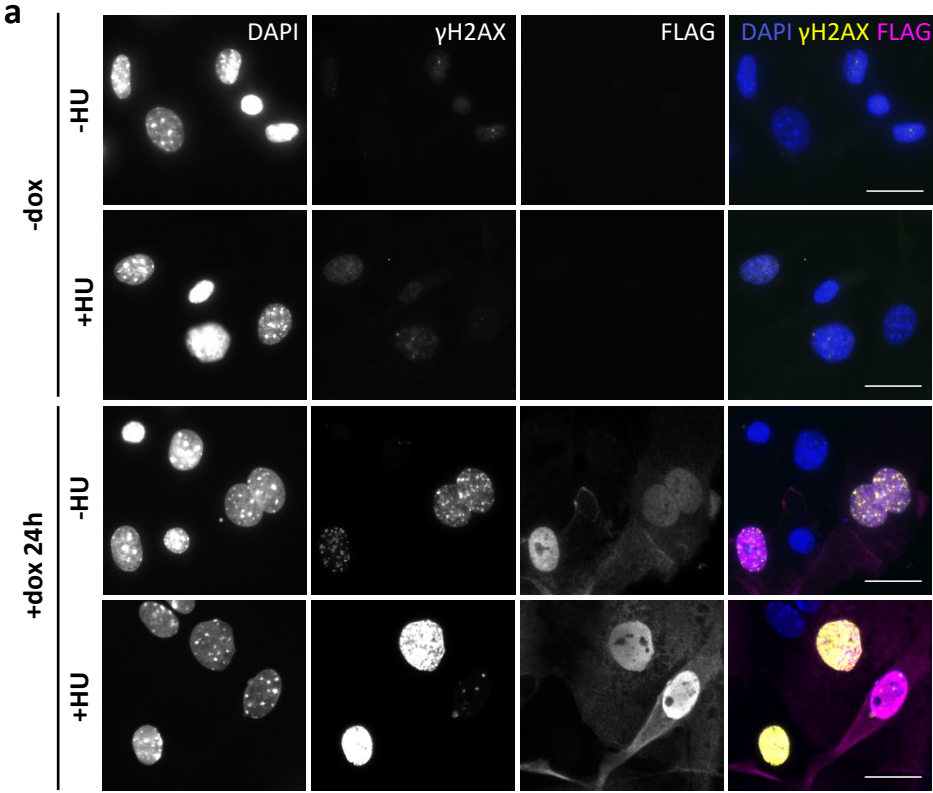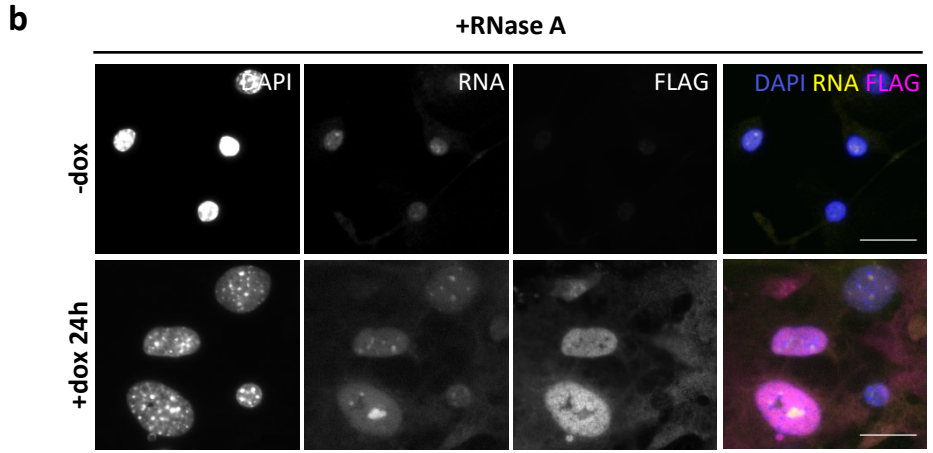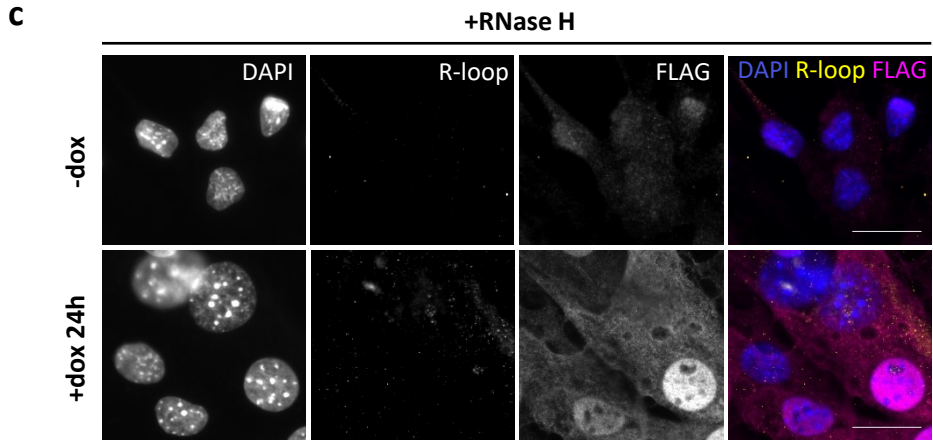

**Supplementary Figure 4. TC expression mediates hypertranscription and replication stress in endothelial cells.**

**a** Representative images showing endothelial cells treated with or without dox for 24h to induce TC expression, alongside hydroxyurea (HU) or not to induce replication stress. Cells were stained with DAPI (nuclei; blue), FLAG antibody (TC; magenta), and  $\gamma$ H2AX antibody (phospho-H2AX; yellow).

**b** Representative images showing nascent RNA staining in endothelial cells incubated with 5-EU for 1h, with or without dox for 24h to induce TC expression. Cells were treated with RNaseA prior to staining as a negative control. Cells were stained for 5-EU (nascent RNA; yellow), DAPI (nuclei; blue) and FLAG (TC; magenta).

**c** Representative images showing S9.6 antibody staining to visualise R-loops in endothelial cells treated with or without dox for 24h to induce TC expression. Cells were treated with RNaseH prior to staining as a negative control. Cells were stained for R-loops (yellow), DAPI (nuclei; blue) and FLAG (TC; magenta).

All imaging was performed on a Zeiss fluorescence widefield microscope using a 63x oil immersion objective. Scale bars=20 $\mu$ m in all panels. In all imaging experiments, at least 150 cells per condition were analysed, n=3.

# Supplementary Figure 5

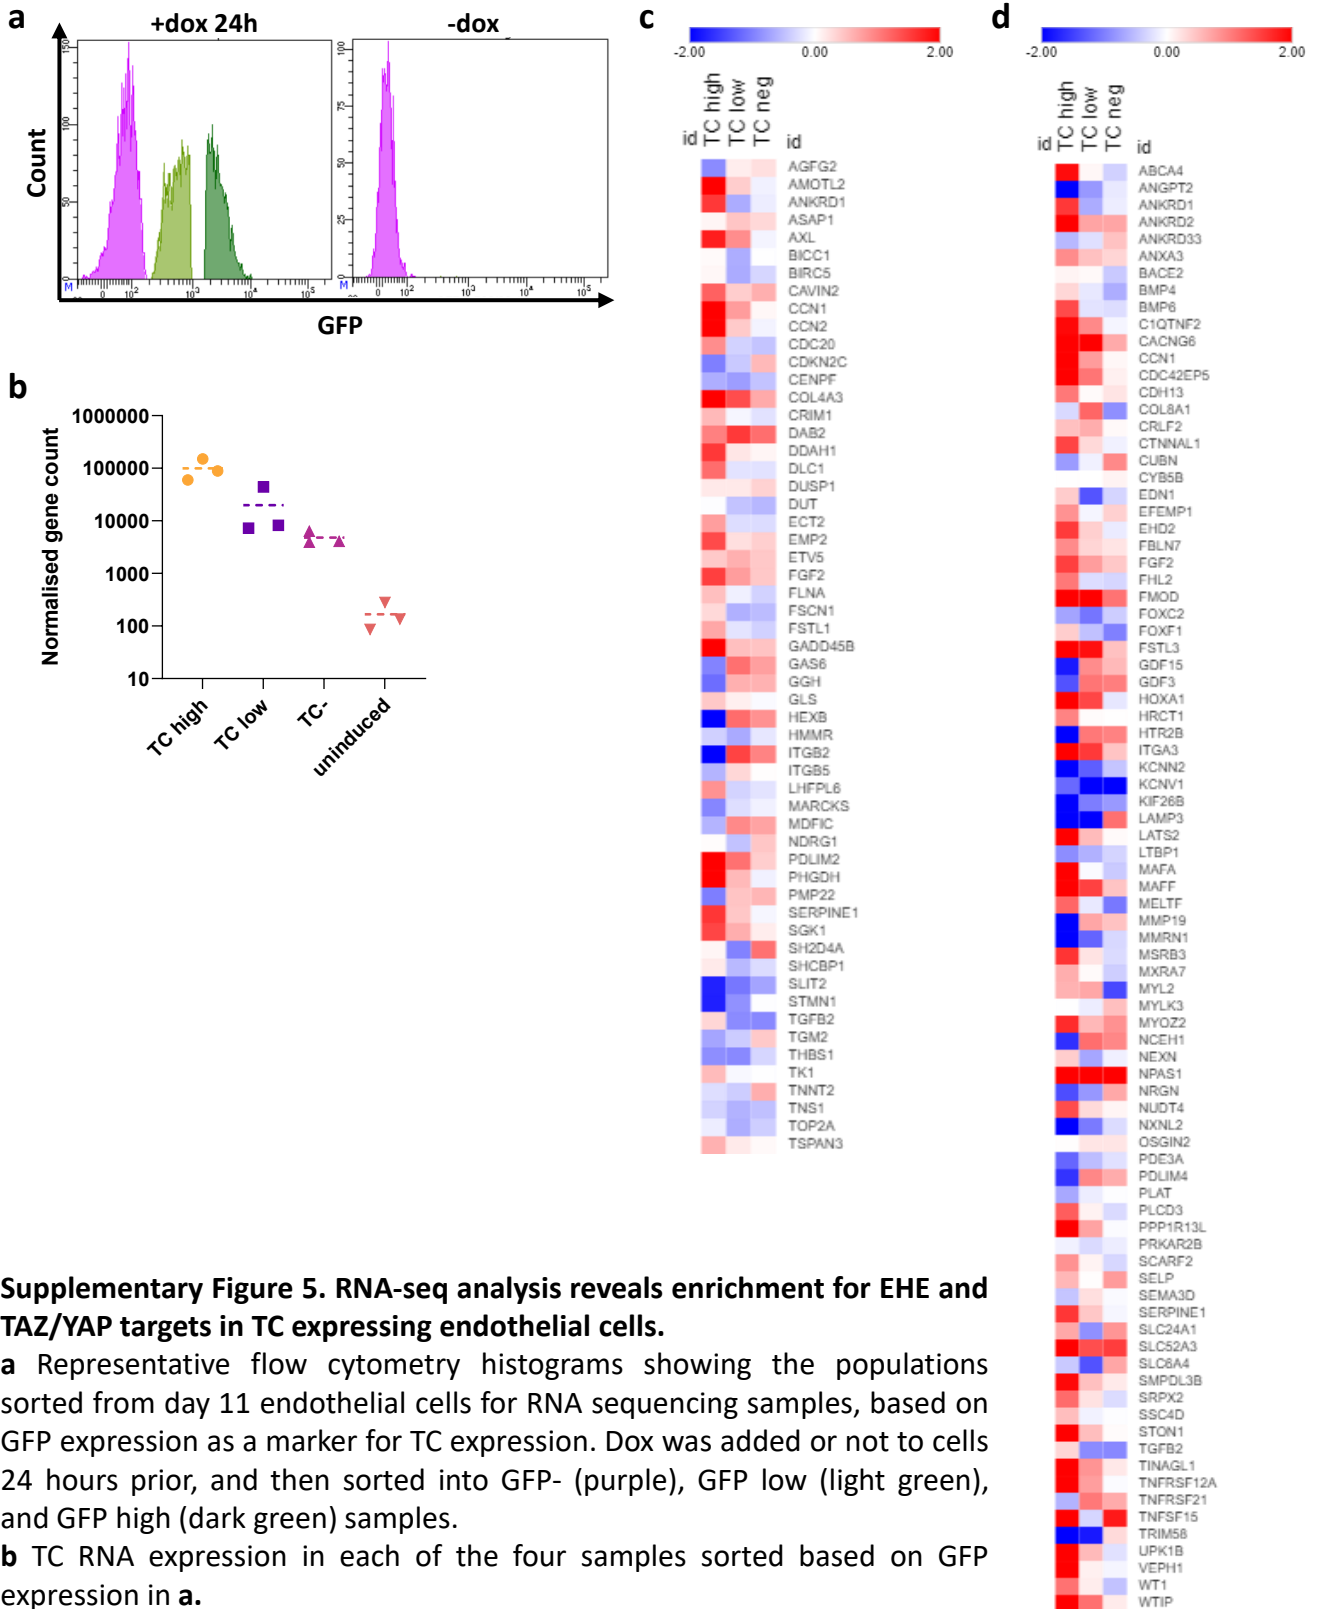

## Supplementary Figure 5. RNA-seq analysis reveals enrichment for EHE and TAZ/YAP targets in TC expressing endothelial cells.

**a** Representative flow cytometry histograms showing the populations sorted from day 11 endothelial cells for RNA sequencing samples, based on GFP expression as a marker for TC expression. Dox was added or not to cells 24 hours prior, and then sorted into GFP- (purple), GFP low (light green), and GFP high (dark green) samples.

**b** TC RNA expression in each of the four samples sorted based on GFP expression in **a**.

**c** Heatmap showing log<sub>2</sub> fold change in RNA expression of Cordenonsi YAP conserved signature gene set when comparing TC high, TC low and TC- endothelial cell populations to uninduced controls.

**d** Heatmap showing log<sub>2</sub> fold change in RNA expression of Seavey Epithelioid Haemangioendothelioma gene set when comparing TC high, TC low and TC- endothelial cell populations to uninduced controls.

# Supplementary Figure 6

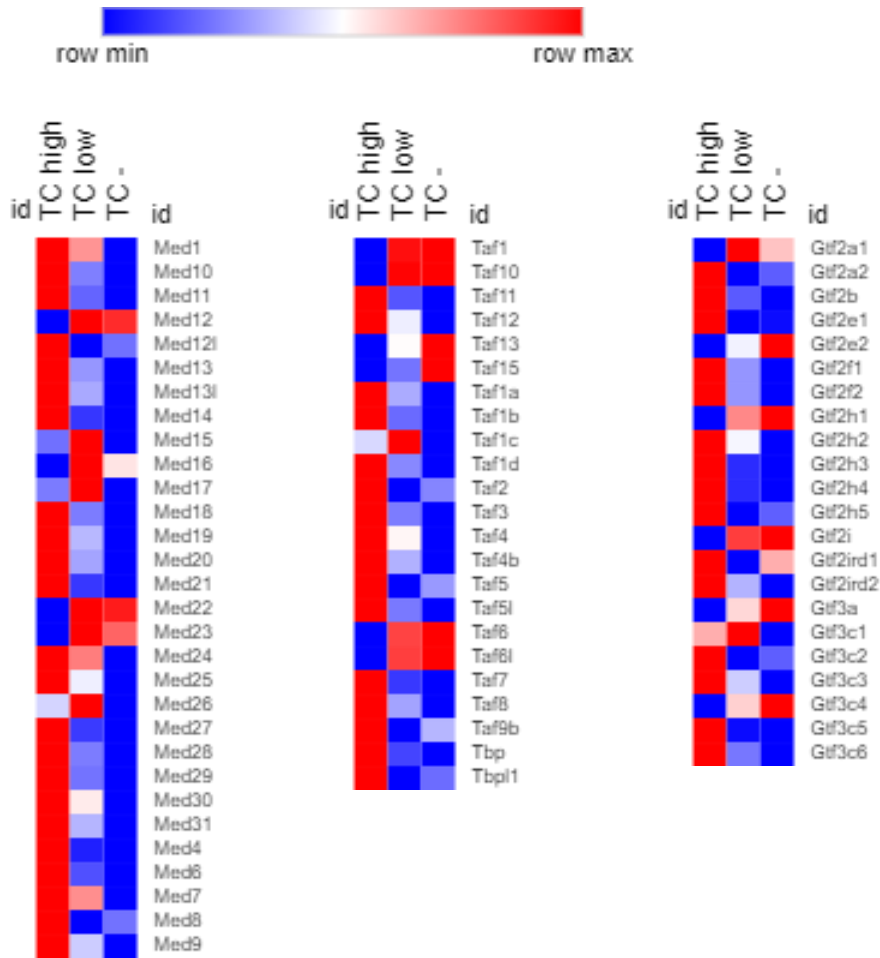

**Supplementary Figure 6. RNA-seq analysis reveals increased expression of genes associated with active transcription mediated by polymerase II in TC expressing endothelial cells.**

Heatmap showing log<sub>2</sub> fold change in RNA expression of mediator subunit (Med) genes, TATA-binding protein (TBP) and TBP-associated factor (Taf) genes and general transcription factor (Gtf) genes when comparing TC high, TC low and TC- endothelial cell populations to uninduced controls.



# Supplementary Figure 7

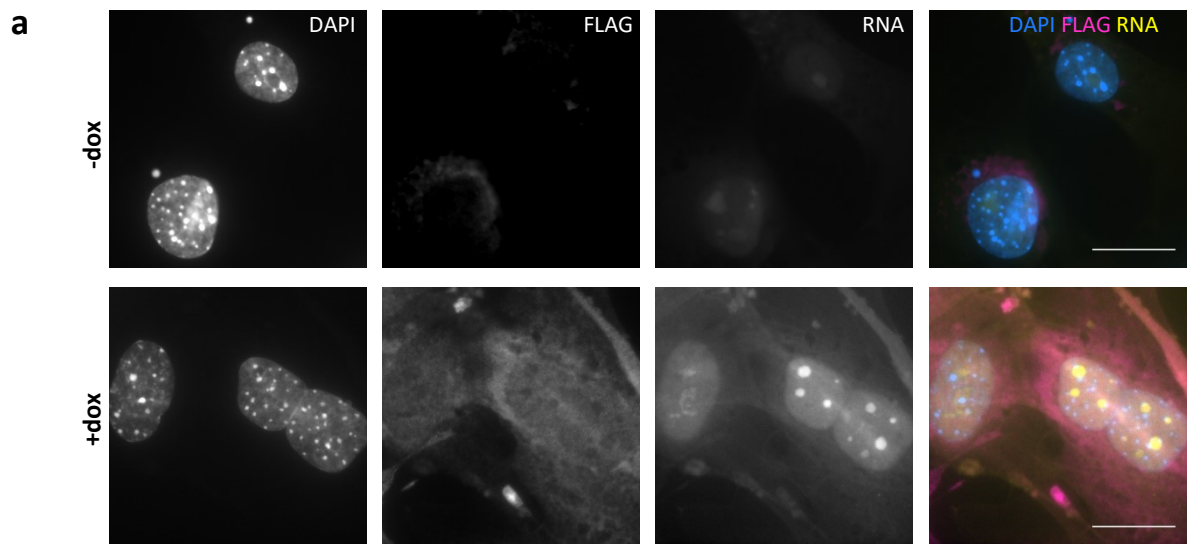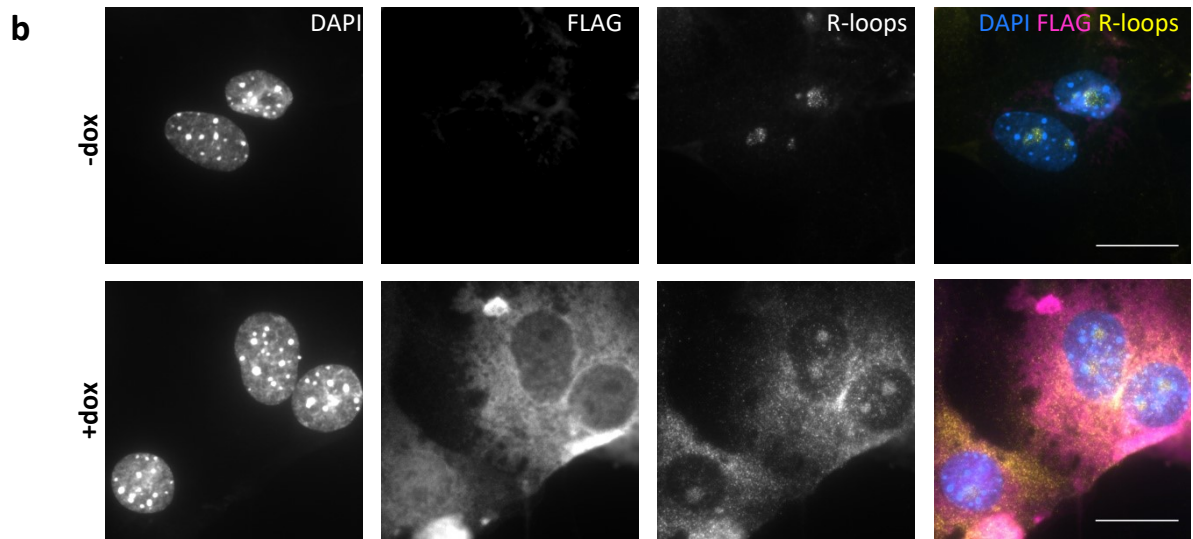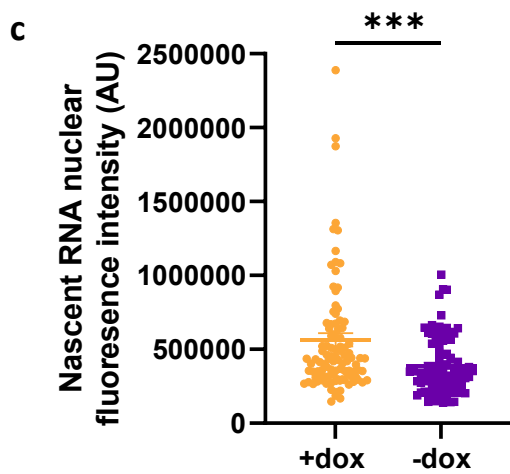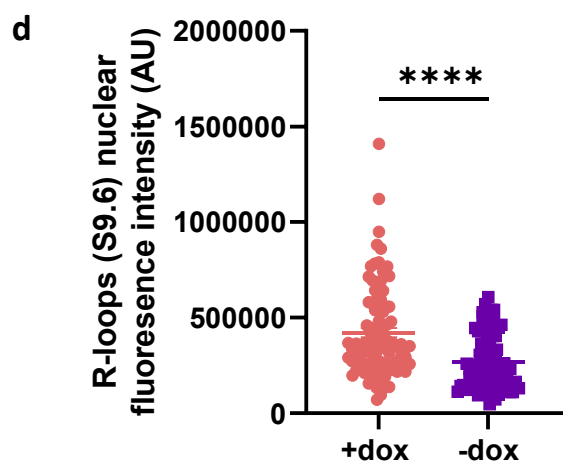

**Supplementary Figure 7. TC-S51A expression mediates hypertranscription and replication stress in endothelial cells.**

**a** Representative images showing nascent RNA staining after endothelial cells were incubated with 5-EU for 1h, and treated with or without dox for 24h to induce TC-S51A expression. Cells were stained for 5-EU (nascent RNA; yellow), DAPI (nuclei; blue) and FLAG (TC; magenta).

**b** Representative images showing S9.6 antibody staining to visualise R-loops in endothelial cells treated with or without dox for 24h to induce TC-S51A expression. Cells were stained for R-loops (yellow), DAPI (nuclei; blue) and FLAG (TC; magenta).

**c** Fluorescence intensity of nuclear 5-EU staining as shown in **a**, to quantify nascent RNA in endothelial samples treated with dox for 24h or not.

**d** Fluorescence intensity of nuclear S9.6 antibody staining as shown in **b**, to quantify the presence of R-loops in endothelial samples treated with dox for 24h or not.

Imaging was performed on a Zeiss fluorescence widefield microscope using a 63x oil immersion objective. Scale bars=20 $\mu$ m. In all imaging experiments, at least 145 cells per condition were analysed. Statistical significance was determined with a one-way ANOVA and Sidak's multiple comparisons test, n=3. In all panels error bars show SEM, and \*p<0.05, \*\*p<0.01, \*\*\*p<0.001, \*\*\*\*p<0.0001.

# Supplementary Figure 8

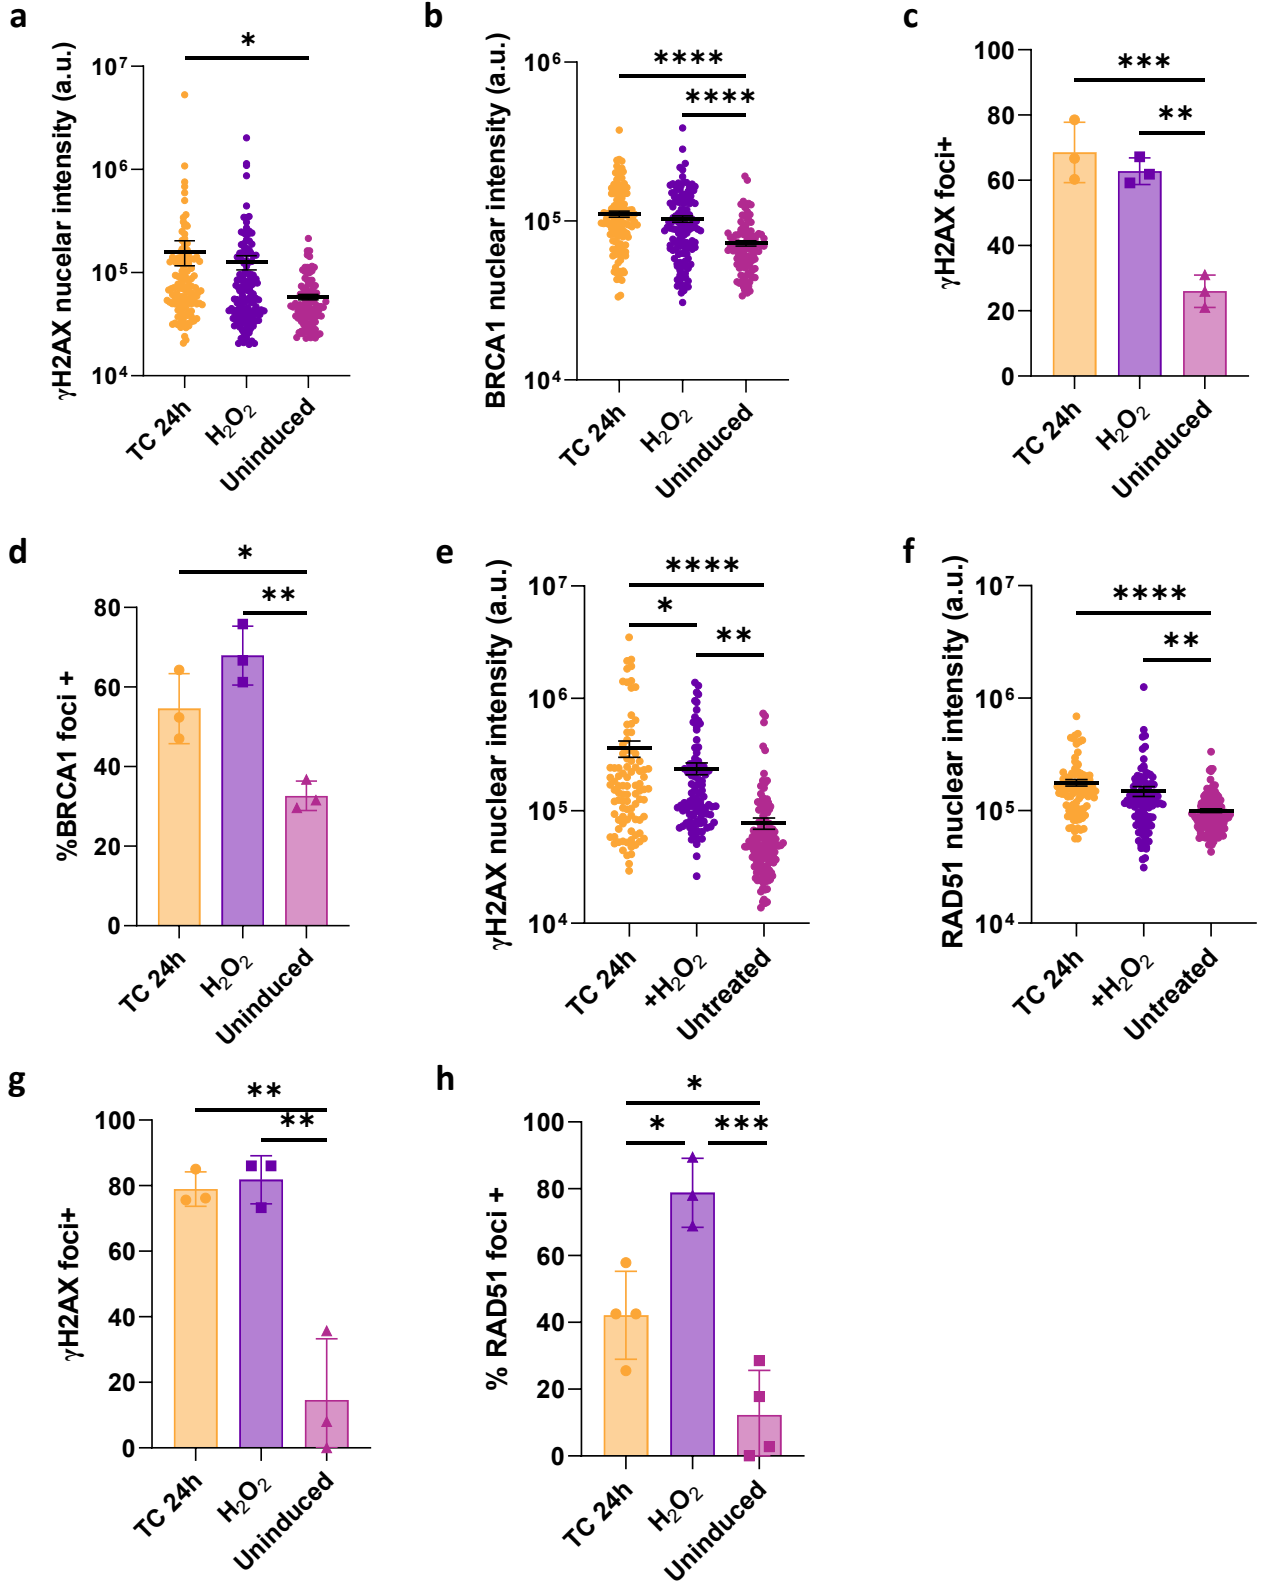

**Supplementary Figure 8. Homologous recombination is impaired in TC expressing endothelial cells.**

**a** Nuclear fluorescence intensity of  $\gamma$ H2AX staining in cells treated with dox for 24h to induce TC expression or not, or treated with 30 $\mu$ M H<sub>2</sub>O<sub>2</sub> as a positive control. These values correspond to the BRCA1 staining presented in **Fig 4a, b**.

**b** Nuclear fluorescence intensity of BRCA1 staining in cells treated with dox for 24h to induce TC expression or not, or treated with 30 $\mu$ M H<sub>2</sub>O<sub>2</sub> as a positive control. These values correspond to the BRCA1 staining presented in **Fig 4a, b**.

**c** The frequency of endothelial cells positive for  $\gamma$ H2AX foci staining in cells treated with dox for 24h to induce TC expression or not, or treated with 30 $\mu$ M H<sub>2</sub>O<sub>2</sub> as a positive control. Cells with >10 foci were considered positive. These values correspond to the BRCA1 staining presented in **Fig 4a, c**.

**d** The frequency of endothelial cells positive for BRCA1 foci staining in cells treated with dox for 24h to induce TC expression or not, or treated with 30 $\mu$ M H<sub>2</sub>O<sub>2</sub> as a positive control. Cells with >10 foci were considered positive. These values correspond to the BRCA1 staining presented in **Fig 4a, c**.

**e** Nuclear fluorescence intensity of  $\gamma$ H2AX staining in cells treated with dox for 24h to induce TC expression or not, or treated with 30 $\mu$ M H<sub>2</sub>O<sub>2</sub> as a positive control. These values correspond to the RAD51 staining presented in **Fig 4d, e**.

**f** Nuclear fluorescence intensity of RAD51 staining in cells treated with dox for 24h to induce TC expression or not, or treated with 30 $\mu$ M H<sub>2</sub>O<sub>2</sub> as a positive control. These values correspond to the RAD51 staining presented in **Fig 4d, e**.

**g** The frequency of endothelial cells positive for  $\gamma$ H2AX foci staining in cells treated with dox for 24h to induce TC expression or not, or treated with 30 $\mu$ M H<sub>2</sub>O<sub>2</sub> as a positive control. Cells with >10 foci were considered positive. These values correspond to the RAD51 staining presented in **Fig 4d, f**.

**h** The frequency of endothelial cells positive for RAD51 foci staining in cells treated with dox for 24h to induce TC expression or not, or treated with 30 $\mu$ M H<sub>2</sub>O<sub>2</sub> as a positive control. Cells with >10 foci were considered positive. These values correspond to the RAD51 staining presented in **Fig 4d, f**.

In all panels error bars show SEM, and significance was calculated by one-way ANOVA and Sidak's multiple comparisons test. \*p<0.05, \*\*p<0.01, \*\*\*p<0.001, \*\*\*\*p<0.0001.

# Supplementary Figure 9

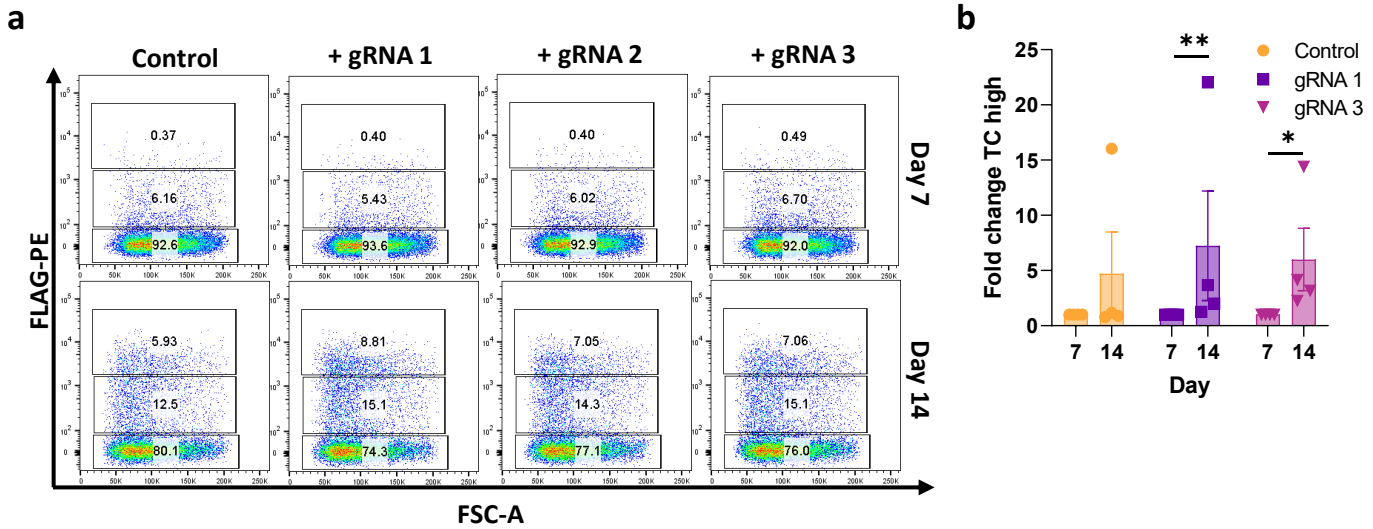

## Supplementary Figure 9. *Cdkn2a* knockdown endothelial cells allows increased TC expression.

**a** Representative flow cytometry plots showing TC expression against FSC-A at day 14 after *Cdkn2a* knockout or not.

**b** Fold change of TC high population between days 7 and 14 after addition of dox in comparison to uninduced, *Cdkn2a* knockout endothelial cells, n=4. Statistical significance was calculated with a two-way ANOVA and Sidak's multiple comparisons test. All error bars show SEM, and \*p<0.05, \*\*p<0.01, \*\*\*p<0.001, \*\*\*\*p<0.0001.

# Supplementary Figure 10

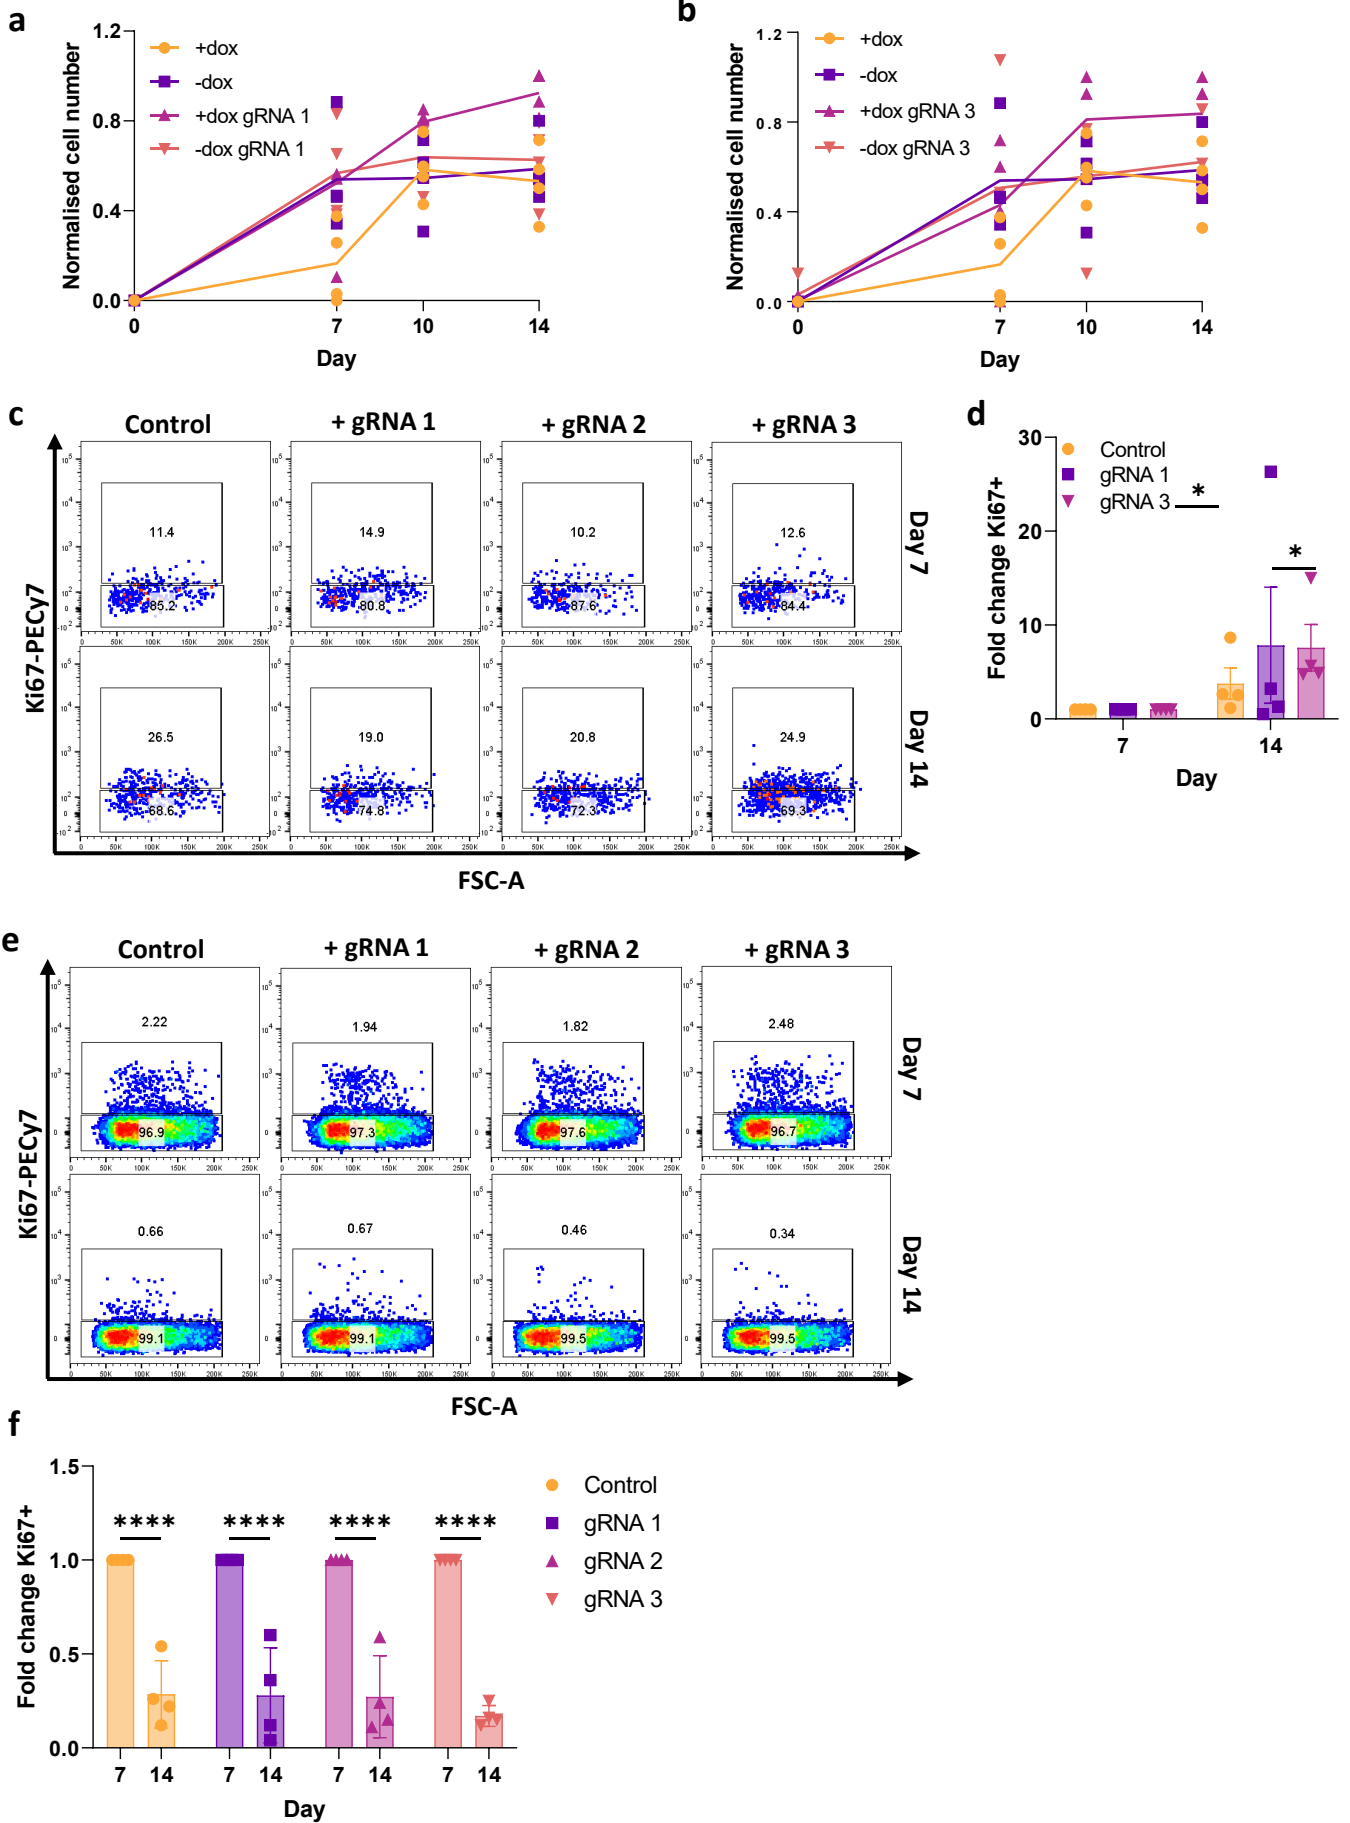

**Supplementary Figure 10. *Cdkn2a* knockdown in TC expressing endothelial cells allows bypass of growth arrest.**

**a** Normalised cell number in *Cdkn2a* knockout endothelial cells, treated or not with dox, over 14 days, using gRNA 1. Statistical significance was calculated with a two-way ANOVA and Sidak's multiple comparisons test, n=4.

**b** Normalised cell number in *Cdkn2a* knockout endothelial cells, treated or not with dox, over 14 days, using gRNA 3. Statistical significance was calculated with a two-way ANOVA and Sidak's multiple comparisons test, n=4. P-values for **a** and **b** are outlined in Supplementary Table 1.

**c** Representative flow cytometry plots showing Ki67 expression within the TC high population against FSC-A at day 7 and 14 after *Cdkn2a* knockout or not.

**d** Fold change of Ki67 expression within the TC high population between days 7 and 14 after addition of dox in comparison to uninduced, *Cdkn2a* knockout endothelial cells, n=4. Statistical significance was calculated with a two-way ANOVA and Sidak's multiple comparisons test.

**e** Representative flow cytometry plots showing Ki67 expression within the uninduced endothelial cell population against FSC-A at day 7 and 14 after *Cdkn2a* knockout or not.

**f** Fold change of Ki67 expression within the uninduced endothelial cell population between days 7 and 14 after addition of dox in comparison to uninduced endothelial cells, n=4. Statistical significance was calculated with a two-way ANOVA and Sidak's multiple comparisons test. In all panels error bars show SEM, and \*p<0.05, \*\*p<0.01, \*\*\*p<0.001, \*\*\*\*p<0.0001.

# Supplementary Table 1

|                    | Day 7        | Day 10       | Day 14       |
|--------------------|--------------|--------------|--------------|
| gRNA 1             |              |              |              |
| +dox v -dox        | 0.0010 **    | 0.9631       | 0.8904       |
| +dox v +dox gRNA 1 | 0.0016 **    | 0.0769       | 0.0006 ***   |
| +dox v -dox gRNA 1 | 0.0004 ***   | 0.8793       | 0.6269       |
| gRNA 2             |              |              |              |
| +dox v -dox        | <0.0001 **** | >0.9999      | 0.9992       |
| +dox v +dox gRNA 2 | <0.0001 **** | <0.0001 **** | <0.0001 **** |
| +dox v -dox gRNA 2 | 0.0004 ***   | 0.8008       | 0.8734       |
| gRNA 3             |              |              |              |
| +dox v -dox        | 0.0025 **    | 0.9709       | 0.9118       |
| +dox v +dox gRNA 3 | 0.0381 *     | 0.0816       | 0.0145 *     |
| +dox v -dox gRNA 3 | 0.0060 **    | 0.9919       | 0.7128       |

**P-values for normalised cell counts in *Cdkn2a* knockout experiments.**



## Supplementary Table 2: Antibodies used for immunofluorescence and flow cytometry experiments

| Target     | Species      | Fluorochrome         | Dilution        | Application                    | Manufacturer                 |
|------------|--------------|----------------------|-----------------|--------------------------------|------------------------------|
| Primary    |              |                      |                 |                                |                              |
| FLAG       | Rabbit/mouse | Unconjugated         | 1:500           | IF                             | Sigma                        |
| γH2AX      | Rabbit       | Unconjugated         | 1:200           | IF                             | Cell Signalling Technologies |
| RAD51      | Mouse        | Unconjugated         | 1:50            | IF                             | Invitrogen                   |
| BRCA1      | Rabbit       | Unconjugated         | 1:750           | IF                             | Invitrogen                   |
| p16        | Rabbit       | Unconjugated         | 1:100<br>1:500  | IF<br>Flow cytometry           | Abcam                        |
| R-loops    | Mouse        | Unconjugated         | 1:50            | IF                             | Abcam                        |
| FLK1       | Rat          | PECy7                | 1:200<br>1:100  | Flow cytometry<br>Cell sorting | BioLegend                    |
| TIE2       | Rat          | PE                   | 1:200<br>1:100  | Flow cytometry<br>Cell sorting | eBioscience                  |
| CD144      | Rat          | APC                  | 1:100           | Flow cytometry                 | eBioscience                  |
| CD31       | Rat          | PerCP-Cy5.5          | 1:100           | Flow cytometry                 | BioLegend                    |
| FLAG       | Rat          | PE, BV421            | 1:800           | Flow cytometry                 | BioLegend                    |
| γH2AX      | Rabbit       | APC                  | 1:400           | Flow cytometry                 | Cell Signalling Technologies |
| Ki67       | Rat          | PECy7                | 1:1000          | Flow cytometry                 | eBioscience                  |
| Secondary  |              |                      |                 |                                |                              |
| Rabbit IgG | Goat         | Alexa Fluor 647      | 1:800<br>1:2000 | IF<br>Flow cytometry           | Invitrogen                   |
| Rabbit IgG | Goat         | Alexa Fluor Plus 555 | 1:800           | IF                             | Invitrogen                   |
| Mouse IgG  | Goat         | Alexa Fluor 647      | 1:800           | IF                             | Invitrogen                   |
| Mouse IgG  | Goat         | Alexa Fluor 555      | 1:800           | IF                             | Invitrogen                   |

## Supplementary Table 3: Sequences of guide RNA used for CRISPR/Cas9 knockout of *Cdkn2a*.

| gRNA # | Target | Sequence             | Manufacturer                |
|--------|--------|----------------------|-----------------------------|
| 1      | Cdkn2a | TGAGCTGAAGCTATGCCCGT | Integrated DNA Technologies |
| 2      | Cdkn2a | GGAAGGCTTCCTGGACACGC | Integrated DNA Technologies |
| 3      | Cdkn2a | GGGAACGTCGCCAGACCGA  | Integrated DNA Technologies |
