# Supplementary material for: The oncogenic fusion protein TAZ::CAMTA1 promotes genomic instability and senescence through hypertranscription
Source: PubMed Central journal article supplement (PMC10657451; doi:10.1038/s42003-023-05540-4), 2023-11-18
Supplement: 42003_2023_5540_MOESM2_ESM.pdf [file 42003_2023_5540_MOESM2_ESM.pdf]

## **Description of Additional Supplementary Files**

**File name:** Supplementary Data

**Description:** All source data behind all graphs in the paper
